# Supplementary material for: Perspective-driven performance mueasurement for supply chain management
Source: MDPI journal article supplement (doi:10.3390/v15040873), 2001-01-01
Supplement: s1 [file s1]

Table S1. Nucleotide sequences of the primers used for the SARS-CoV-2 strains

| Primer name       | Sequence (5' to 3')           |
|-------------------|-------------------------------|
| Fragment 1_70-F   | ACAAAAGAAAATGACTCTAAAGAGGGTTT |
| Fragment 1_71-R   | TGGAAAAGAAAGGTAAGAACAAGTCCT   |
| Fragment 2_72-F   | ACACGTGGTGTATTACCCTGAC        |
| Fragment 2_73-R   | CACCAGCTGTCCAACCTGAAGA        |
| Fragment 3_74-F   | ACATCACTAGGTTTCAAACCTTACTTGC  |
| Fragment 3_75-R   | ACCACCAACCTTAGAATCAAGATTGT    |
| Fragment 4_76-F   | AGGGCAAACCTGGAAAGATTGCT       |
| Fragment 4_77-R   | CAGCCCCTATTAAACAGCCTGC        |
| Fragment 5_78-F   | CAACTTACTCCTACTTGGCGTGT       |
| Fragment 5_79-R   | CATTTCATCTGTGAGCAAAGGTGG      |
| Fragment 6_80-F   | TTGCCTTGGTGATATTGCTGCT        |
| Fragment 6_81-R   | GTGAAGTTCTTTTCTTGTGCAGGG      |
| Fragment 7_82-F   | GGGCTATCATCTTATGTCCTTCCCT     |
| Fragment 7_83-R   | TTTGACTCCTTTGAGCACTGGC        |
| Fragment 8_84-F   | TGCTGTAGTTGTCTCAAGGGCT        |
| Fragment 8_85-R   | ACACAGTCTTTTACTCCAGATTCCC     |
| Fragment 1-1_69-F | TGTCGCAAAATATACTCAACTGTGTCA   |
| Fragment 1-1_70-R | TGACCTTCTTTTAAAGACATAACAGCAG  |
| Fragment 1-2_71-F | ACAAATCCAATTCAGTTGTCTTCCTATTC |
| Fragment 1-2_72-R | ACTCTGAACTCACTTTCCATCCAAC     |
| Fragment 3-1_73-F | CAATTTTGTAATGATCCATTTTGGGTGT  |
| Fragment 3-1_74-R | GCAACACAGTTGCTGATTCTCTTC      |
| Fragment 3-2_75-F | AGAGTCCAACCAACAGAATCTATTGT    |
| Fragment 3-2_76-R | ACACCTGTGCCTGTAAACCAT         |

Table S2. Representative sequences for the Wild-type, Alpha, Epsilon, Delta, and Omicron (BA.1, BA.2, and BA.2.12.1) variants

| Type                | Representative strain                                                         | GenBank Accession number |
|---------------------|-------------------------------------------------------------------------------|--------------------------|
| Wild                | SARS-CoV-2 isolate Wuhan-Hu-1, complete genome                                | NC045512                 |
| Alpha               | SARS-CoV-2 isolate SARS-CoV-2/human/USA/FL-CDC-STM-P012/2020, complete genome | MW430974                 |
| Epsilon             | SARS-CoV-2/human/USA/CA-LACPHL-AF00014/2020, complete genome                  | MW411934                 |
| Delta               | SARS-CoV-2/human/USA/IN-CDC-STM-000045992/2021, complete genome               | MW931310                 |
| Omicron (BA.1)      | SARS-CoV-2/human/BEL/rega-20174/2021                                          | OL672836                 |
| Omicron (BA.2)      | SARS-CoV-2/human/USA/FL-CDC-STM-77CPCCUR3/2022                                | OM371884                 |
| Omicron (BA.2.12.1) | SARS-CoV-2/human/USA/NY-CDC-LC0553978/2022                                    | OM958567                 |

Table S3. Major spike mutations of Alpha variants of concern found in the encoded proteins of SARS-CoV-2 strains

| Time            | H69del        | V70del       | Y144del      | E484K         | N501Y         | D614G        | P681H         | T716I       | S982A       | D1118H       |
|-----------------|---------------|--------------|--------------|---------------|---------------|--------------|---------------|-------------|-------------|--------------|
| 2021.01-2021.06 | 18.8% (6/32)  | 9.4% (3/32)  | 21.9% (7/32) | 31.3% (10/32) | 9.4% (3/32)   | 100% (32/32) | 21.9% (7/32)  | 9.4% (3/32) | 9.4% (3/32) | 21.9% (7/32) |
| 2021.07-2021.12 | 3.0% (1/33)   | 3.0% (1/33)  | 3.0% (1/33)  | 6.1% (2/33)   | 3.0% (1/33)   | 100% (33/33) | 3.0% (1/33)   | 3.0% (1/33) | 3.0% (1/33) | 3.0% (1/33)  |
| 2022.01-2022.07 | 37.8% (14/37) | 24.3% (9/37) | 21.6% (8/37) | 0% (0/37)     | 94.6% (35/37) | 100% (37/37) | 94.6% (35/37) | 0% (0/37)   | 0% (0/37)   | 0% (0/37)    |

Table S4. Major spike mutations of Delta variants of concern found in the encoded proteins of SARS-CoV-2 strains

| Time            | T19R          | T95I         | G142D         | E156del       | F157del       | R158G         | A222V         | K417N         | L452R         | T478K         | D614G        | P681R         | D950N         |
|-----------------|---------------|--------------|---------------|---------------|---------------|---------------|---------------|---------------|---------------|---------------|--------------|---------------|---------------|
| 2021.01-2021.06 | 6.3% (2/32)   | 0% (0/32)    | 6.3% (2/32)   | 6.3% (2/32)   | 6.3% (2/32)   | 6.3% (2/32)   | 6.3% (2/32)   | 0% (0/32)     | 12.5% (4/32)  | 6.3% (2/32)   | 100% (32/32) | 6.3% (2/32)   | 6.3% (2/32)   |
| 2021.07-2021.12 | 90.9% (30/33) | 0% (0/33)    | 90.9% (30/33) | 90.9% (30/33) | 90.9% (30/33) | 90.9% (30/33) | 63.6% (21/33) | 0% (0/33)     | 90.9% (30/33) | 90.9% (30/33) | 100% (33/33) | 90.9% (30/33) | 87.9% (29/33) |
| 2022.01-2022.07 | 2.7% (1/37)   | 21.6% (8/37) | 94.6% (35/37) | 2.7% (1/37)   | 2.7% (1/37)   | 2.7% (1/37)   | 2.7% (1/37)   | 45.9% (17/37) | 21.6% (8/37)  | 97.3% (36/37) | 100% (37/37) | 2.7% (1/37)   | 2.7% (1/37)   |

Table S5. Major spike mutations of Epsilon variants of concern found in the encoded proteins of SARS-CoV-2 strains

| Time            | S13I        | W152C       | D614G        |
|-----------------|-------------|-------------|--------------|
| 2021.01-2021.06 | 6.3% (2/32) | 6.3% (2/32) | 100% (32/32) |
| 2021.07-2021.12 | 0% (0/33)   | 0% (0/33)   | 100% (33/33) |
| 2022.01-2022.07 | 0% (0/37)   | 0% (0/37)   | 100% (37/37) |

Table S6. Major spike mutations of Omicron (BA.1.1) variants of concern found in the encoded proteins of SARS-CoV-2 strains

[illegible]

Table S7. Major spike mutations of Omicron (BA.2) variants of concern found in the encoded proteins of SARS-CoV-2 strains

| Omicron (BA.2)  | T19I          | L24del        | A27S          | V213G         | S371F         | T376A         | D405N         | R408S         |
|-----------------|---------------|---------------|---------------|---------------|---------------|---------------|---------------|---------------|
| 2021.01-2021.06 | 0% (0/32)     | 0% (0/32)     | 0% (0/32)     | 0% (0/32)     | 0% (0/32)     | 0% (0/32)     | 0% (0/32)     | 0% (0/32)     |
| 2021.07-2021.12 | 0% (0/32)     | 0% (0/32)     | 0% (0/32)     | 0% (0/32)     | 0% (0/32)     | 0% (0/32)     | 0% (0/32)     | 0% (0/32)     |
| 2022.01-2022.07 | 70.3% (26/37) | 73.0% (27/37) | 73.0% (27/37) | 75.7% (28/37) | 70.3% (26/37) | 70.3% (26/37) | 70.3% (26/37) | 70.3% (26/37) |
